# Supplementary material for: Ni0.33Co0.66(OH)F hollow hexagons woven by MWCNTs for high-performance lithium-ion batteries
Source: Royal Society of Chemistry journal article supplement (doi:10.1039/c5ta05143f), 2015-01-01
Supplement: c5ta05143f1.pdf [file c5ta05143f1.pdf]

## Supporting Information

### **Ni<sub>0.33</sub>Co<sub>0.66</sub>(OH)F Hollow Hexagons Woven by MWCNTs for High-Performance Lithium-Ion Batteries**

Huaping Chen<sup>a,†</sup>, Yufei Zhang<sup>b,c,†</sup>, Jun Yang<sup>b</sup>, Ziyang Dai,<sup>b</sup> Nina Fu,<sup>a</sup> Wei Huang<sup>\*a,b</sup>,

Xiaochen Dong<sup>\*b</sup>

<sup>a</sup>Key Laboratory for Organic Electronics & Information Displays (KLOEID), Nanjing University of Posts and Telecommunications, Nanjing 210023, China.

<sup>b</sup>Key Laboratory of Flexible Electronics (KLOFE) & Institute of Advanced Materials (IAM), Jiangsu National Synergistic Innovation Center for Advanced Materials (SICAM), Nanjing Tech University (NanjingTech), 30 South Puzhu Road, Nanjing 211816, China.

<sup>c</sup>School of Chemistry and Chemical Engineering, Inner Mongolia University, 010021, China.

*E-mail: iamxcdong@njtech.edu.cn, iamwhuang@@njtech.edu.cn*

<sup>†</sup> These authors contribute equally

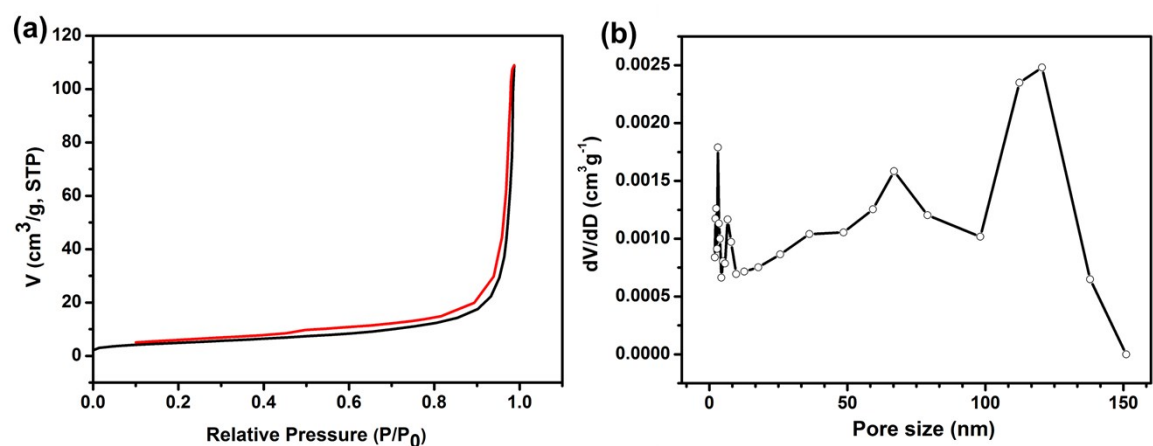

Figure S1 (a)  $N_2$  adsorption–desorption isotherms and (b) the corresponding pore size distribution.

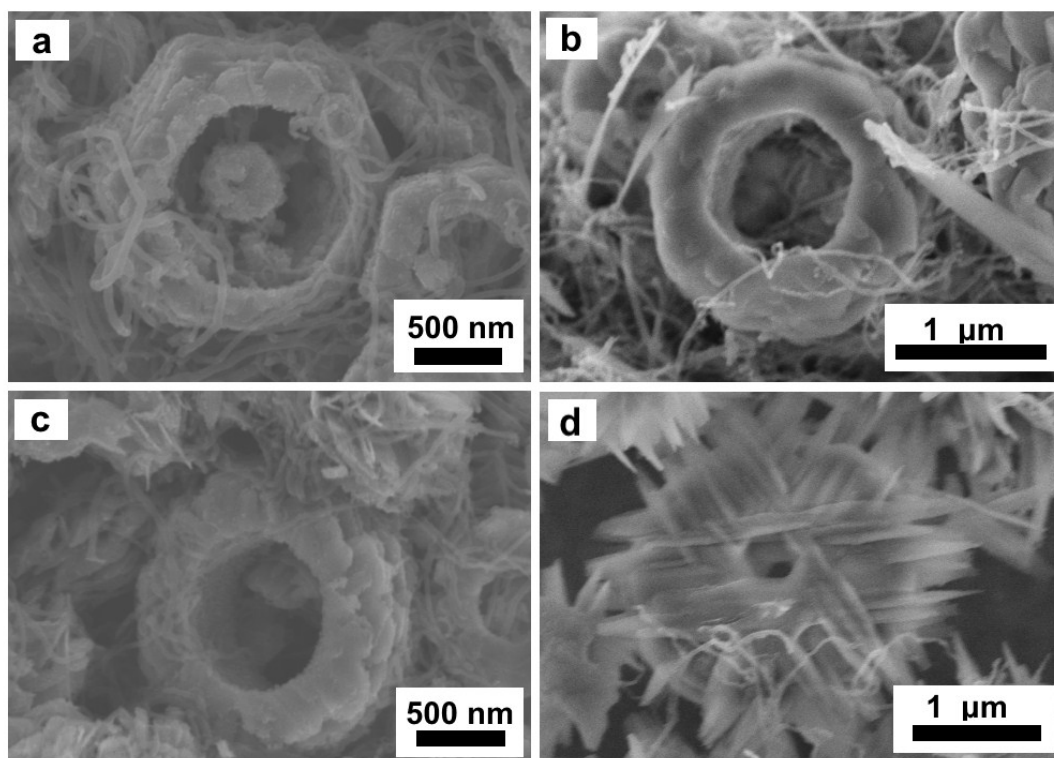

Figure S2 SEM images of the  $\text{Ni}_x\text{Co}_{1-x}(\text{OH})\text{F}/\text{CNTs}$  obtained at different concentration of  $\text{NH}_4\text{F}$ . (a) 0.09 M, (b) 0.27 M. (c) 0.36 M, (d) 0.45 M.

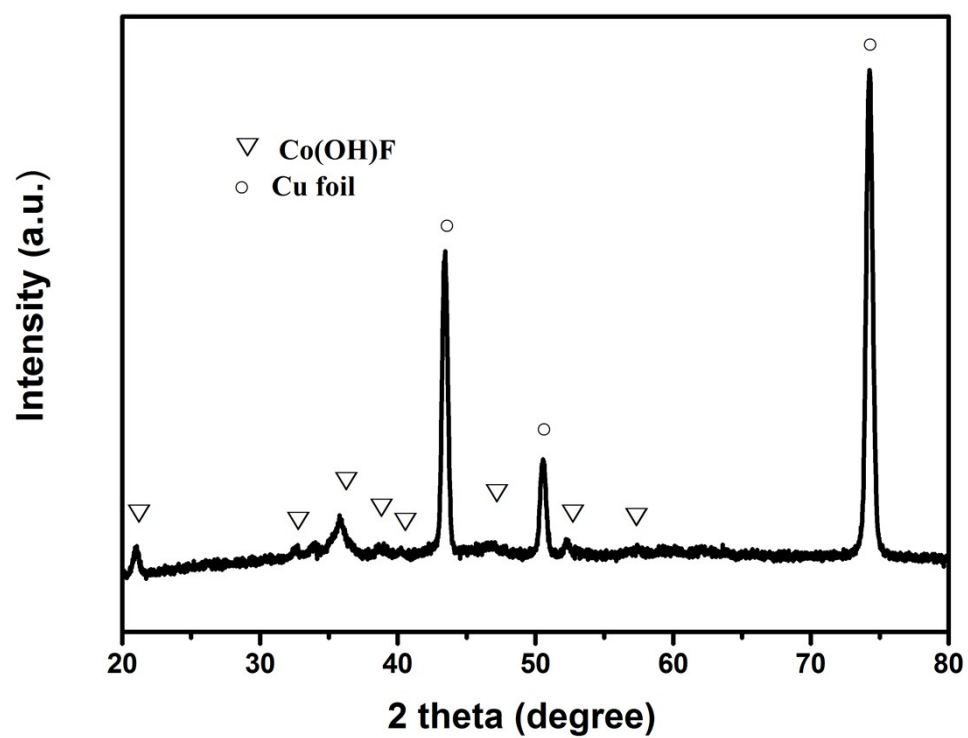

Figure S3 XRD pattern of the hollow hexagons  $\text{Ni}_x\text{Co}_{1-x}(\text{OH})\text{F}/\text{CNTs}$  after one time tested as material for LIBs.

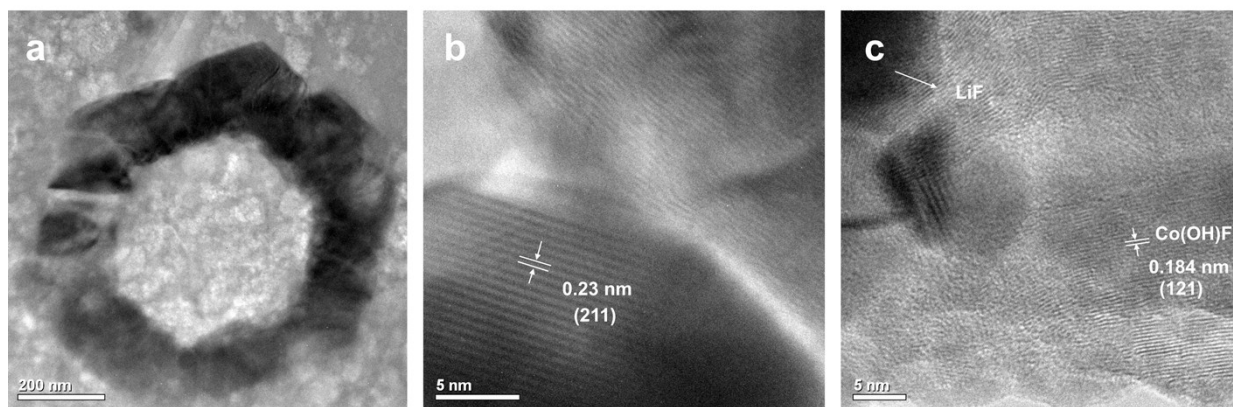

Figure S4 TEM images of hollow hexagons  $\text{Ni}_x\text{Co}_{1-x}(\text{OH})\text{F}/\text{CNTs}$  after the first discharged (lithiated) state.

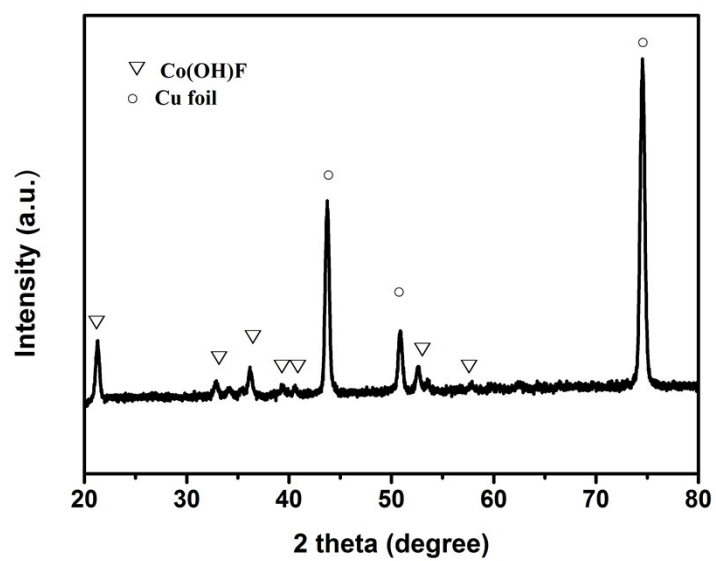

Figure S5 XRD pattern of the hollow hexagons  $\text{Ni}_x\text{Co}_{1-x}(\text{OH})\text{F}/\text{CNTs}$  after tested for 100 cycles.

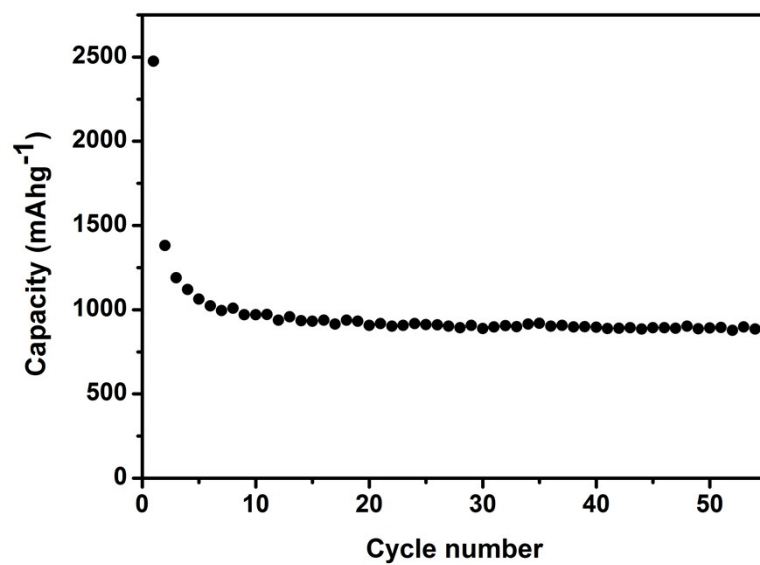

Figure S6 Cycling performance of  $\text{Ni}_{0.33}\text{Co}_{0.66}(\text{OH})\text{F}/\text{CNTs}$  at a current density of  $200 \text{ mA g}^{-1}$ .
